# Supplementary material for: Effect of monovalent cations (Li+, Na+, K+, Cs+) on self-assembly of thiol-modified double-stranded and single-stranded DNA on gold electrode
Source: Royal Society of Chemistry journal article supplement (doi:10.1039/c2an15716k), 2012-01-01
Supplement: c2an15716k.pdf [file c2an15716k.pdf]

## Supporting Information

### Effect of monovalent cations ( $\text{Li}^+$ , $\text{Na}^+$ , $\text{K}^+$ , $\text{Cs}^+$ ) on self-assembly of thiol-modified double-stranded and single-stranded DNA on gold electrode

Zhiguo Li,<sup>a,b</sup> Tianxing Niu,<sup>a</sup> Zhenjiang Zhang,<sup>a,c</sup> Guiying Feng,<sup>a</sup> and Shuping Bi<sup>\*a</sup>

<sup>a</sup> *School of Chemistry and Chemical Engineering, State Key Laboratory of Coordination Chemistry & Key Laboratory of MOE for Life Science, Nanjing University, Nanjing 210093, China*

<sup>b</sup> *School of Chemistry Science and Technology, Zhanjiang Normal University, Zhanjiang 524048, Guangdong, China*

<sup>c</sup> *College of Chemistry, Chemical Engineering and Materials Science, Soochow University, Suzhou 215006, China*

#### Contents

- [1. Scheme for self-assembly process of thiol-modified ds-DNA or ss-DNA on gold.](#)
2. Interfacial parameters for characterizing ds-DNA-SAMs on gold assembled in 0.1 M or 1 M LiCl, NaCl, KCl, CsCl solutions.
3. Interfacial parameters for characterizing ss-DNA-SAMs on gold assembled in 0.1 M or 1 M LiCl, NaCl, KCl, CsCl solutions.
4. Confirmation of our experimental results ( $\Gamma_m$ ,  $C$ ,  $R_{it}^*$ ,  $\Delta i$ ,  $R_{ct}$ )
5. References

## 1. Scheme for self-assembly process of thiol-modified ds-DNA or ss-DNA on gold.

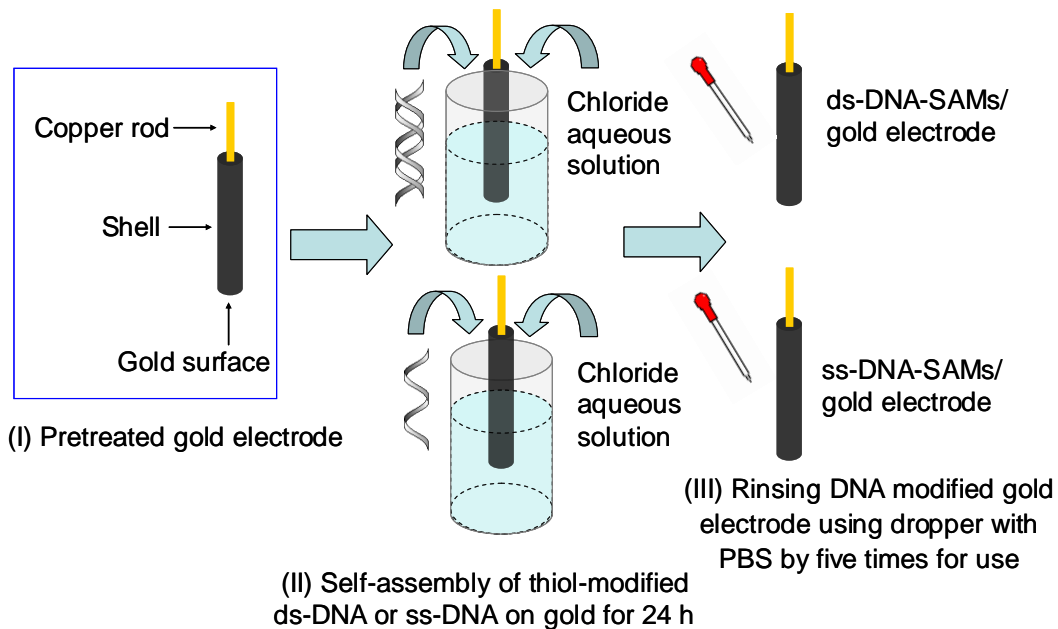

**Scheme S1.** Self-assembly process of thiol-modified ds-DNA or ss-DNA on gold. (Chloride aqueous solution is 0.1 M or 1 M LiCl, NaCl, KCl, CsCl aqueous solution; PBS is 5 mM phosphate-50 mM NaCl, pH 7.0).

## 2. Interfacial parameters for characterizing ds-DNA-SAMs on gold assembled in 0.1 M or 1 M LiCl, NaCl, KCl, CsCl solutions

**Table S1.** Parameters for characterizing ds-DNA-SAMs on gold assembled in 0.1 M or 1 M LiCl, NaCl, KCl, CsCl solutions

| Assembly electrolytes | Surface coverage                                           |  | Ions penetration<br>(5 mM phosphate-50 mM NaCl, pH 7.0) |                          |                        |                        |                            |                                    | Charge transfer<br>(2 mM Fe(CN) <sub>6</sub> <sup>3-/4-</sup> ) |                                  |     |                       |
|-----------------------|------------------------------------------------------------|--|---------------------------------------------------------|--------------------------|------------------------|------------------------|----------------------------|------------------------------------|-----------------------------------------------------------------|----------------------------------|-----|-----------------------|
|                       | <i>CC</i>                                                  |  | <i>CV</i>                                               |                          |                        |                        | <i>EIS</i>                 |                                    | <i>CV</i>                                                       | <i>EIS</i>                       |     |                       |
|                       | $\Gamma_m$<br>(10 <sup>-11</sup><br>mol cm <sup>-2</sup> ) |  | <i>C</i> (μF cm <sup>-2</sup> )                         |                          |                        |                        | $\Phi_{1\text{Hz}}$<br>(°) | $R_{it}^*$<br>(Ω cm <sup>2</sup> ) | $\Delta j$<br>(μA cm <sup>-2</sup> )                            | $R_{ct}$<br>(Ω cm <sup>2</sup> ) |     |                       |
|                       |                                                            |  | 0.1<br>V s <sup>-1</sup>                                | 0.5<br>V s <sup>-1</sup> | 1<br>V s <sup>-1</sup> | 5<br>V s <sup>-1</sup> | 20<br>V s <sup>-1</sup>    | 50<br>V s <sup>-1</sup>            |                                                                 |                                  |     |                       |
| 0.1 M LiCl            | 0.5                                                        |  | 19.4                                                    | 12.8                     | 10.6                   | 6.8                    | 4.8                        | 3.9                                | 70                                                              | 1.7 × 10 <sup>4</sup>            | 129 | 7.6 × 10 <sup>3</sup> |
| 0.1 M NaCl            | 0.7                                                        |  | 17.0                                                    | 12.4                     | 11.0                   | 8.7                    | 7.1                        | 6.3                                | 76                                                              | 1.6 × 10 <sup>4</sup>            | 320 | 2.2 × 10 <sup>3</sup> |
| 0.1 M KCl             | 0.6                                                        |  | 24.6                                                    | 17.7                     | 15.3                   | 10.5                   | 7.7                        | 6.4                                | 74                                                              | 1.2 × 10 <sup>4</sup>            | 183 | 5.4 × 10 <sup>3</sup> |
| 0.1 M CsCl            | 0.6                                                        |  | 22.6                                                    | 16.1                     | 13.8                   | 9.9                    | 7.5                        | 6.4                                | 74                                                              | 1.3 × 10 <sup>4</sup>            | 266 | 2.0 × 10 <sup>3</sup> |
| 1 M LiCl              | 1.4                                                        |  | 16.7                                                    | 11.8                     | 10.3                   | 7.7                    | 6.3                        | 5.7                                | 75                                                              | 1.7 × 10 <sup>4</sup>            | 23  | 5.2 × 10 <sup>4</sup> |
| 1 M NaCl              | 1.8                                                        |  | 21.2                                                    | 15.1                     | 12.9                   | 9.4                    | 7.7                        | 7.0                                | 75                                                              | 1.4 × 10 <sup>4</sup>            | 30  | 4.5 × 10 <sup>4</sup> |
| 1 M KCl               | 1.4                                                        |  | 22.0                                                    | 15.6                     | 13.7                   | 10.4                   | 8.4                        | 7.3                                | 76                                                              | 1.3 × 10 <sup>4</sup>            | 80  | 1.3 × 10 <sup>4</sup> |
| 1 M CsCl              | 1.1                                                        |  | 22.4                                                    | 14.8                     | 12.4                   | 8.5                    | 6.6                        | 5.8                                | 72                                                              | 1.4 × 10 <sup>4</sup>            | 60  | 1.7 × 10 <sup>4</sup> |

## 3. The parameters for characterizing ss-DNA-SAMs on gold assembled in 0.1 M or 1 M LiCl, NaCl, KCl, CsCl solutions

**Table S2.** Parameters for characterizing ss-DNA-SAMs on gold assembled in 0.1 M or 1 M LiCl, NaCl, KCl, CsCl solutions

| Assembly electrolytes | Surface coverage                                           |  | Ions penetration<br>(5 mM phosphate-50 mM NaCl, pH 7.0) |                          |                        |                        |                            |                                    | Charge transfer<br>(2 mM Fe(CN) <sub>6</sub> <sup>3-/4-</sup> ) |                                  |     |                       |
|-----------------------|------------------------------------------------------------|--|---------------------------------------------------------|--------------------------|------------------------|------------------------|----------------------------|------------------------------------|-----------------------------------------------------------------|----------------------------------|-----|-----------------------|
|                       | <i>CC</i>                                                  |  | <i>CV</i>                                               |                          |                        |                        | <i>EIS</i>                 |                                    | <i>CV</i>                                                       | <i>EIS</i>                       |     |                       |
|                       | $\Gamma_m$<br>(10 <sup>-11</sup><br>mol cm <sup>-2</sup> ) |  | <i>C</i> (μF cm <sup>-2</sup> )                         |                          |                        |                        | $\Phi_{1\text{Hz}}$<br>(°) | $R_{it}^*$<br>(Ω cm <sup>2</sup> ) | $\Delta j$<br>(μA cm <sup>-2</sup> )                            | $R_{ct}$<br>(Ω cm <sup>2</sup> ) |     |                       |
|                       |                                                            |  | 0.1<br>V s <sup>-1</sup>                                | 0.5<br>V s <sup>-1</sup> | 1<br>V s <sup>-1</sup> | 5<br>V s <sup>-1</sup> | 20<br>V s <sup>-1</sup>    | 50<br>V s <sup>-1</sup>            |                                                                 |                                  |     |                       |
| 0.1 M LiCl            | 1.9                                                        |  | 11.7                                                    | 7.4                      | 6.4                    | 4.8                    | 4.1                        | 3.8                                | 73                                                              | 2.8 × 10 <sup>4</sup>            | 48  | 3.7 × 10 <sup>4</sup> |
| 0.1 M NaCl            | 2.0                                                        |  | 20.8                                                    | 14.8                     | 12.4                   | 9.1                    | 7.2                        | 6.4                                | 73                                                              | 1.5 × 10 <sup>4</sup>            | 109 | 7.8 × 10 <sup>3</sup> |
| 0.1 M KCl             | 2.2                                                        |  | 16.7                                                    | 11.4                     | 9.9                    | 7.4                    | 5.9                        | 5.4                                | 75                                                              | 1.9 × 10 <sup>4</sup>            | 36  | 5.6 × 10 <sup>4</sup> |
| 0.1 M CsCl            | 2.3                                                        |  | 15.4                                                    | 10.5                     | 9.1                    | 7.0                    | 5.9                        | 5.3                                | 75                                                              | 2.0 × 10 <sup>4</sup>            | 32  | 6.5 × 10 <sup>4</sup> |
| 1 M LiCl              | 4.9                                                        |  | 30.0                                                    | 20.6                     | 17.2                   | 12.3                   | 9.6                        | 8.2                                | 74                                                              | 1.1 × 10 <sup>4</sup>            | 15  | 2.4 × 10 <sup>5</sup> |
| 1 M NaCl              | 5.1                                                        |  | 23.3                                                    | 15.9                     | 13.8                   | 10.6                   | 9.0                        | 8.3                                | 75                                                              | 1.3 × 10 <sup>4</sup>            | 19  | 1.1 × 10 <sup>5</sup> |
| 1 M KCl               | 3.9                                                        |  | 44.2                                                    | 29.7                     | 24.8                   | 16.6                   | 12.1                       | 10.1                               | 72                                                              | 7.9 × 10 <sup>3</sup>            | 20  | 2.2 × 10 <sup>5</sup> |
| 1 M CsCl              | 4.0                                                        |  | 22.2                                                    | 15.0                     | 13.0                   | 9.2                    | 6.9                        | 6.0                                | 75                                                              | 1.4 × 10 <sup>4</sup>            | 35  | 9.1 × 10 <sup>4</sup> |

#### 4. Confirmation of our experimental results ( $\Gamma_m$ , $C$ , $R_{it}^*$ , $\Delta i$ , $R_{ct}$ )

(a) Relative standard deviation (RSD) of experimental data ( $\Gamma_m$ ,  $C$ ,  $R_{it}^*$ ,  $\Delta i$ ,  $R_{ct}$ ) from literature reports

**Table S3.** Relative standard deviation (RSD) of experimental data ( $\Gamma_m$ ,  $C$ ,  $R_{it}^*$ ,  $\Delta i$ ,  $R_{ct}$ ) from literature reports

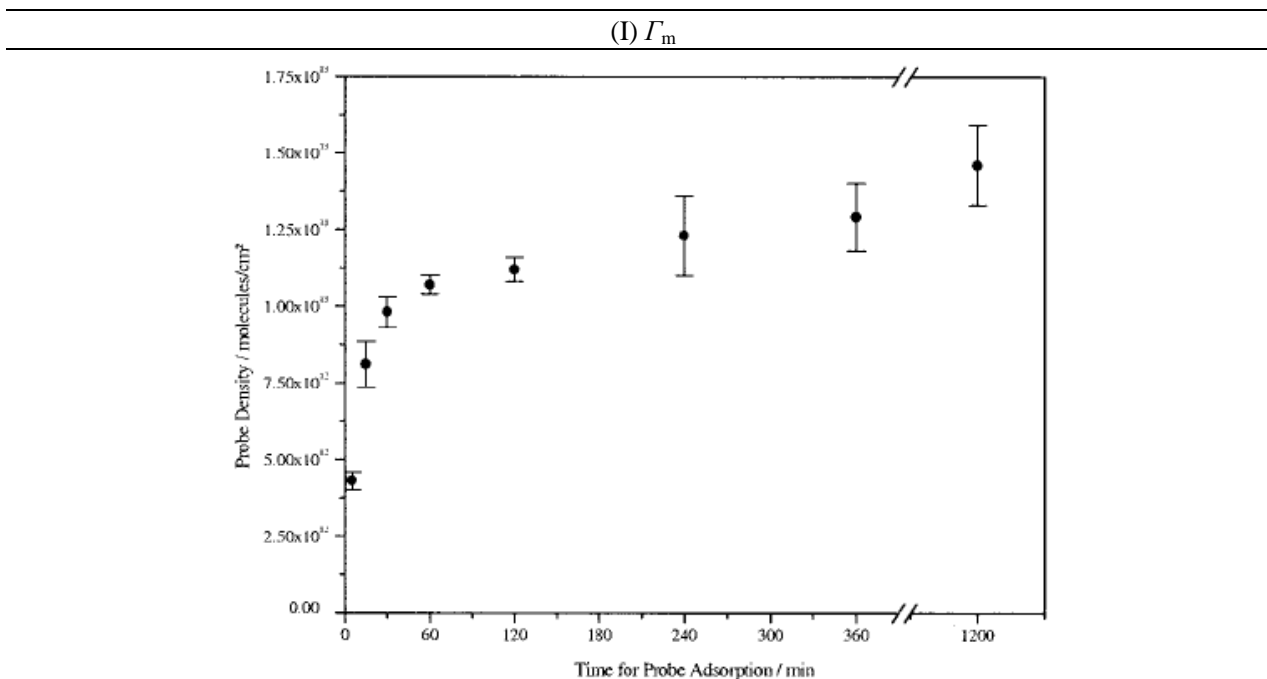

(a) Surface density of 5' thiol-modified 16mer oligonucleotide on gold after 6-mercapto-1-hexanol (MCH) treatment as a function of deposition period. Probe densities were determined electrochemically. The probe, sequence 5'-thiol-ACT-GAC-TGA-CTG-ACT-G-3', was deposited from a 1 mM solution for the indicated time, followed by exposure to 1 mM MCH for 1 h.<sup>1</sup>

(II)  $C$  and  $R_{it}^*$

**Table 1. Capacitance of DNA-Modified Electrodes**

| monolayer | capacitance<br>( $\mu\text{F}/\text{cm}^2$ ) | $n^a$ |
|-----------|----------------------------------------------|-------|
| bare Au   | 43 ± 15                                      | 6     |
| MCH       | 3.9 ± 0.1                                    | 10    |
| P1        | 25 ± 8                                       | 4     |
| P2        | 33 ± 7                                       | 4     |
| P1/MCH    | 4.8 ± 0.2                                    | 8     |
| P2/MCH    | 4.9 ± 0.2                                    | 8     |

<sup>a</sup> The number of independent measurements on different monolayer preparations.

(b) Capacitance of 5' thiol-modified 25mer DNA-SAMs on gold was determined in 10 mM Tris buffer (pH 7.4).<sup>2</sup>

(III)  $\Delta i$  and  $R_{ct}$

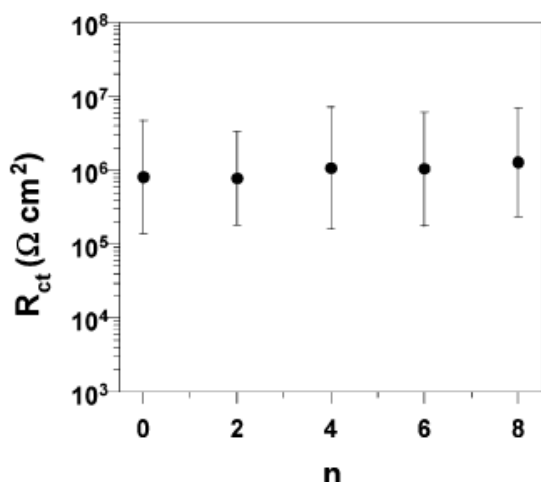

(c) Influence of fluorocarbon chain length ( $n$ ) on the charge transfer resistance ( $R_{ct}$ ) of SAMs prepared by exposure of gold to 0.2 mM  $F_nH_{(16-n)}SH$  in  $CH_2Cl_2$  for 48 h.<sup>3</sup>

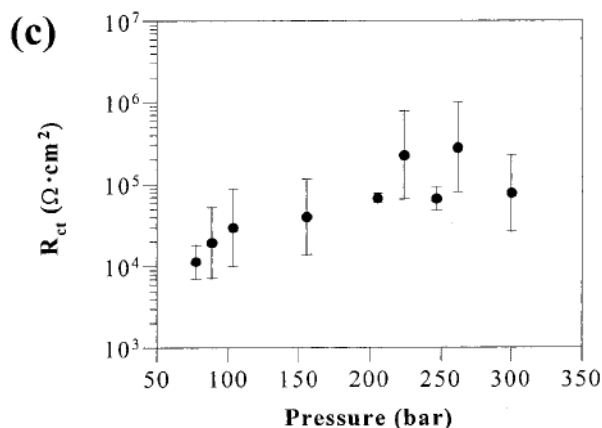

(d) Effect of pressure on the properties of  $C_{12}$  SAMs formed on gold after 30 min in  $CO_2$  at 35 °C, as determined by measuring the charge-transfer resistance. Electrochemical impedance measurements were performed in an aqueous solution containing 0.1 M  $Na_2SO_4$ , 1 mM  $K_3Fe(CN)_6$ , and 1 mM  $K_4Fe(CN)_6 \cdot 3H_2O$ .<sup>4</sup>

**Table 1. Results of the CNLS Fitting of the Impedance Response for Different Deposition Times of the  $n$ -Dodecyl Selenide on a Au(111) Single Crystal Electrode<sup>a</sup>**

| deposition time, s | $R_s, \Omega$ | $R_{ct}, \Omega \times 10^{-6}$ | CPE ( $C_{dl}$ ) $\times 10^7, {}^b F cm^{-2}$ | $\varphi$ |
|--------------------|---------------|---------------------------------|------------------------------------------------|-----------|
| 5                  | 179.3 (1.10)  | 0.11 (0.50)                     | 2.00 (1.50)                                    | 0.9795    |
| 10                 | 177.1 (1.03)  | 1.17 (0.44)                     | 1.11 (0.57)                                    | 0.9929    |
| 60                 | 179.0 (1.28)  | 2.34 (0.69)                     | 1.17 (0.64)                                    | 0.9902    |
| 300                | 147.6 (1.02)  | 4.41 (0.56)                     | 1.23 (0.39)                                    | 0.9850    |
| 54 000             | 148.2 (2.37)  | 7.52 (1.91)                     | 1.34 (0.95)                                    | 0.9567    |
| 86 400             | 171.2 (0.74)  | 11.7 (0.72)                     | 1.15 (0.27)                                    | 0.9928    |

<sup>a</sup> The percent errors from the fit for each element are given in parentheses. <sup>b</sup> The area of the electrode was equal to 0.0856  $cm^{-2}$

(e) Impedance spectra for the Au/ $n$ -Dodecyl performed in solutions containing 0.5 mM  $Fe(CN)_6^{3-/4-}$  with 0.1 M  $NaClO_4$ . Au/ $n$ -Dodecyl was prepared by dipping the Au(111) electrodes into ~3 mM  $n$ -Dodecyl in ethyl alcohol for different time.<sup>5</sup>

\* The *RSD* of parameters ( $R_{it}^*$  and  $\Delta j$ ) for ds-DNA-SAMs and ss-DNA-SAMs on gold had been shown in our recently published papers,<sup>6,7</sup> The *RSD* of  $\Gamma_m$  was smaller than 10%,<sup>1</sup> *RSD* of  $C$ ,  $\Phi_{1Hz}$  and  $R_{it}^*$  was generally smaller than 20%,<sup>2,8</sup> whereas *RSD* of  $\Delta j$  and  $R_{ct}$  was much bigger and even >100%.<sup>3-5,9</sup>

(b) Experimentally cross-checked the experimental data ( $C$  values) for ds-DNA-SAMs and ss-DNA-SAMs on gold assembled in 0.1 M or 1 M LiCl, NaCl, KCl, CsCl solutions by CV and EIS

We calculated the  $C$  of ds-DNA-SAMs and ss-DNA-SAMs by EIS and drew the plots of  $C$  with frequency  $f_m$ . The aim was to further validate the data of  $C$  by CV in Figure 3C and Figure 5C in the manuscript.  $C$  calculated by EIS (Figure S1) was close to that by CV (Figure 3C and Figure 5C). Furthermore,  $C$  calculated by EIS decreased with the increase of  $f_m$  (Figure S1), consistent with the decrease of  $C$  calculated by CV with the increase of scan rate  $\nu$  (Figure 3C and Figure 5C).

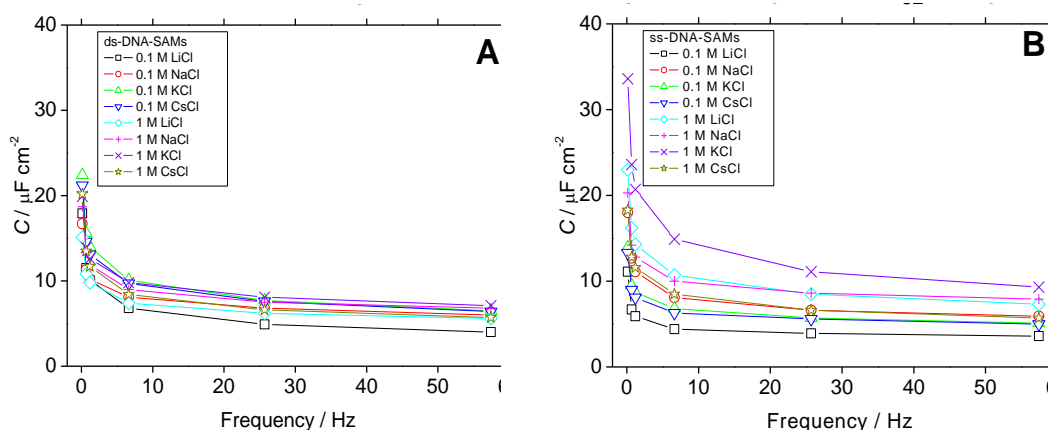

**Figure S1.** The plot of  $C$  obtained from EIS ( $C = \frac{1}{2\pi f_m AZ''}$ ,  $Z''$  was the imaginary parts of impedance at the frequency  $f_m$ ,  $A$  was the real area of electrode)<sup>10</sup> with frequency  $f_m$  for ds-DNA-SAMs (A) and ss-DNA-SAMs (B) on gold assembled under 0.1 M or 1 M LiCl, NaCl, KCl, CsCl solutions. In order to compare the  $C$  obtained from EIS with CV,  $f_m$  was designated close to

$f_m = \frac{\nu}{2\Delta E_m} = \frac{\nu}{2(E_{\max} - E_{\min})}$  based on the potential zone ( $2\Delta E_m = 2(E_{\max} - E_{\min}) = 0.8\text{V}$ ) of a CV scan period from  $-0.2$  ( $E_{\min}$ ) to  $+0.2$  V ( $E_{\max}$ ) and scan rate  $\nu$  (0.1, 0.5, 1, 5, 20, 50  $\text{V s}^{-1}$ ).  $f_m$  was calculated to be 0.12, 0.66, 1.18, 6.64, 25.7, 57.4 Hz.

## 5. References

- 1 A. B. Steel, R. L. Levicky, T. M. Herne and M. J. Tarlov, *Biophys. J.*, 2000, **79**, 975–981.
- 2 A. B. Steel, T. M. Herne and M. J. Tarlov, *Anal. Chem.*, 1998, **70**, 4670–4677.
- 3 R. D. Weinstein, J. Moriarty, E. Cushnie, R. Colorado, T. R. Lee, M. Patel, W. R. Alesi and G. K. Jennings, *J. Phys. Chem. B*, 2003, **107**, 11626–11632.
- 4 R. D. Weinstein, D. Yan and G. K. Jennings, *Ind. Eng. Chem. Res.*, 2003, **40**, 2046–2053.
- 5 L. V. Protsailo, W. R. Fawcett, D. Russell and R. L. Meyer, *Langmuir*, 2002, **18**, 9342–9349.
- 6 Z. G. Li, T. X. Niu, Z. J. Zhang, R. Chen, G. Y. Feng and S. P. Bi, *Analyst*, 2011, **136**, 2090–2099.
- 7 Z. G. Li, T. X. Niu, Z. J. Zhang, R. Chen, G. Y. Feng and S. P. Bi, *Biosens. Bioelectron.*, 2011, **26**, 4564–4570.
- 8 M. Tichoniuk, D. Gwiazdowska, M. Ligaj and M. Filipiak, *Biosens. Bioelectron.*, 2010, **26**, 1618–1623.
- 9 Z. G. Li, T. X. Niu, Z. J. Zhang and S. P. Bi, *Electrochim. Acta*, 2010, **55**, 6907–6916.
- 10 W. O. Ho, S. Krause, C. J. McNeil, J. A. Pritchard, R. D. Armstrong, D. Athey and K. Rawson, *Anal. Chem.*, 1999, **71**, 1940–1946.
